# Supplementary material
Source: MDPI journal article supplement (https://www.mdpi.com/2227-9717/11/5/1343)
Supplement: s1 [file s1]

Article

# Food Waste (Beetroot and Apple Pomace) as Sorbent for Lead from Aqueous Solutions—Alternative to Landfill Disposal

Tatjana Šoštarić <sup>1,\*</sup>, Marija Simić <sup>1</sup>, Zorica Lopičić <sup>1</sup>, Snežana Zlatanović <sup>2</sup>, Ferenc Pastor <sup>3</sup>, Anja Antanasković <sup>1</sup> and Stanislava Gorjanović <sup>2</sup>

<sup>1</sup> Institute for Technology of Nuclear and Other Mineral Raw Materials, ITNMS, Franchet d'Eperey 86, 11000 Belgrade, Serbia

<sup>2</sup> Institute of General and Physical Chemistry, University of Belgrade, Studentski trg 12/V, 11000 Belgrade, Serbia

<sup>3</sup> Faculty of Chemistry, University of Belgrade, Studentski trg 12-16, 11000 Belgrade, Serbia

\* Correspondence: t.sostaric@itnms.ac.rs

**Table S1.** Models used for evaluation of lead sorption onto AP and BR.

| Model                          | Equation                                                                        | Parameter                                                                                                                                                                                                                       | Reference |
|--------------------------------|---------------------------------------------------------------------------------|---------------------------------------------------------------------------------------------------------------------------------------------------------------------------------------------------------------------------------|-----------|
| <b>Isotherm model</b>          |                                                                                 |                                                                                                                                                                                                                                 |           |
| Langmuir                       | $q_e = \frac{q_{max} K_L C_e}{1 + K_L C_e}$                                     | $q_e$ (mg/g): sorption capacity at equilibrium                                                                                                                                                                                  | [1]       |
|                                | $R_L = \frac{1}{(1 + K_L C_0)}$                                                 | $q_{max}$ (mg/g): maximum sorption capacity<br>$K_L$ (L/mg): Langmuir constant<br>$C_e$ (mg/L): equilibrium concentration<br>$R_L$ : dimension less separation factor<br>$C_0$ (mg/L) - the highest initial metal concentration |           |
| Freundlich                     | $q_e = K_f C_e^{1/n}$                                                           | $K_f$ (mg/g)(L/mg) <sup>1/n</sup> : Freundlich constant<br>$n$ : heterogeneity factor                                                                                                                                           | [2]       |
| Sips                           | $q_e = \frac{q_{max} K_s C_e^s}{1 + C_e K_s^s}$                                 | $K_s$ (L/g): Sips constant<br>$s$ : heterogeneity factor                                                                                                                                                                        | [3]       |
| Redlich and Peterson           | $q_e = \frac{k_{RP} C_e}{1 + a_{RP} C_e^{\beta}}$                               | $k_{RP}$ (L/g): Redlich-Peterson isotherm constant<br>$a_{RP}$ (L/mg): Redlich-Peterson isotherm constant<br>$\beta$ : Redlich-Peterson isotherm exponent                                                                       | [4]       |
| <b>Kinetic model</b>           |                                                                                 |                                                                                                                                                                                                                                 |           |
| Pseudo-first order             | $q_t = q_e (1 - e^{-k_1 t})$                                                    | $q_t$ (mg/g): sorption capacity at time $t$<br>$k_1$ (1/min): the pseudo-first order rate constant                                                                                                                              | [5]       |
| Pseudo-second order            | $q_t = \frac{t}{\left(\frac{1}{k_2 q_e^2}\right) + \left(\frac{1}{q_e}\right)}$ | $k_2$ (g/mg/min): the pseudo-second order rate constant                                                                                                                                                                         | [6]       |
|                                | $t_{1/2} = 1/k_2 q_t$                                                           | $t_{1/2}$ (min): half-life of adsorption process                                                                                                                                                                                |           |
| Intra-particle diffusion model | $q = K_{id} t^{0.5} + C$                                                        | $K_{id}$ (mg/(min <sup>1/2</sup> g)): the intra-particle diffusion parameter<br>$C$ (mg/g): intercept                                                                                                                           | [7]       |

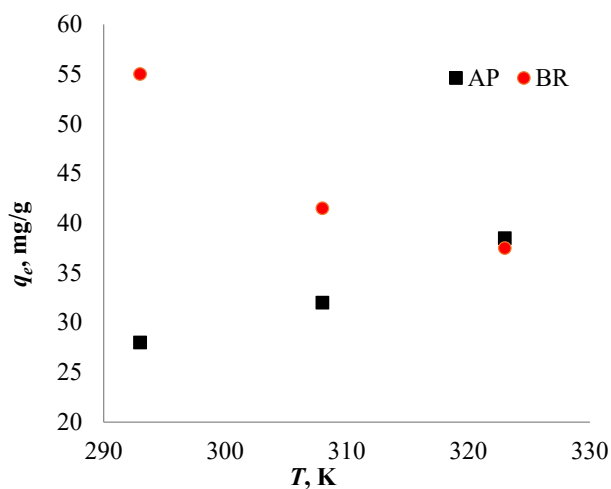

**Figure S1.** Effect of temperature on sorption capacity (pH 5.0, contact time 120 min, sorbent concentration 2 g/L and initial  $\text{Pb}^{2+}$  concentration 200 mg/L, temperature 293–323 K).

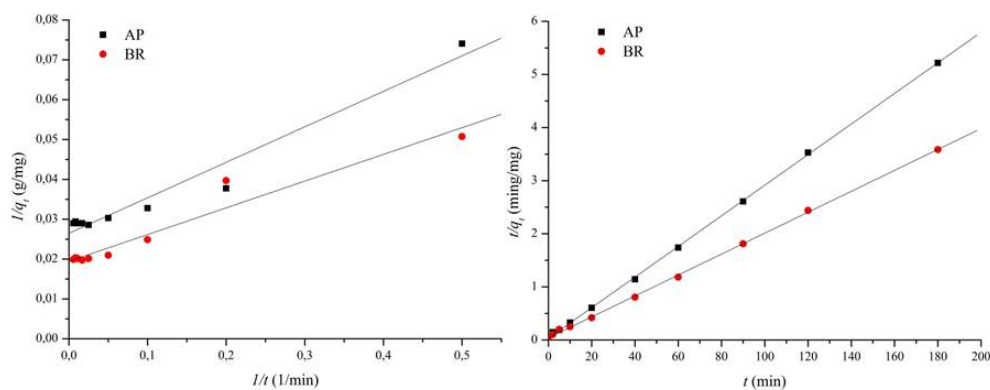

**Figure S2.** Pseudo-first (left) and pseudo-second order (right) kinetics plots of  $\text{Pb}^{2+}$  onto AP and BR (pH 5.0, contact time 1–120 min, sorbent concentration 2 g/L and initial  $\text{Pb}^{2+}$  concentration 200 mg/L, 293 K).

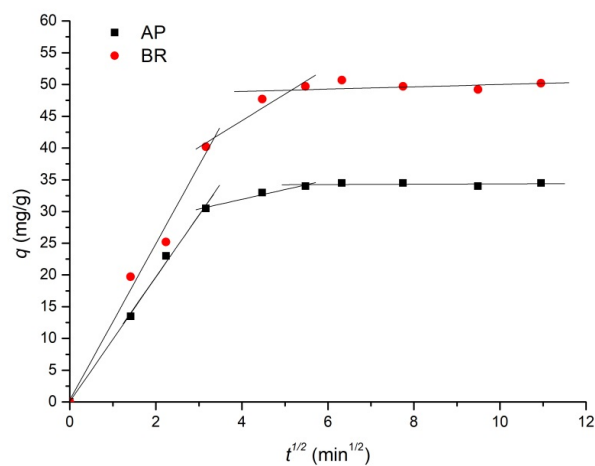

**Figure S3.** Weber-Morris diffusion plots of  $\text{Pb}^{2+}$  onto AP and BR (pH 5.0, contact time 1–120 min, sorbent concentration 2 g/L and initial  $\text{Pb}^{2+}$  concentration 200 mg/L, temperature 293 K).

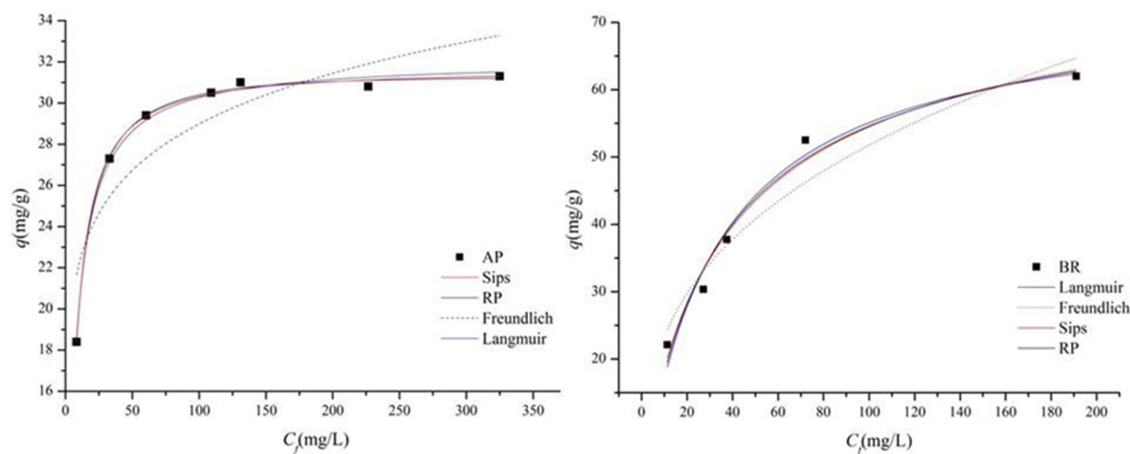

**Figure S4.** Isotherm models of  $Pb^{2+}$  sorption onto AP and BR (pH 5.0, contact time 120 min, sorbent concentration 2 g/L and initial  $Pb^{2+}$  concentration in range from 10–200 mg/L, temperature 293 K).

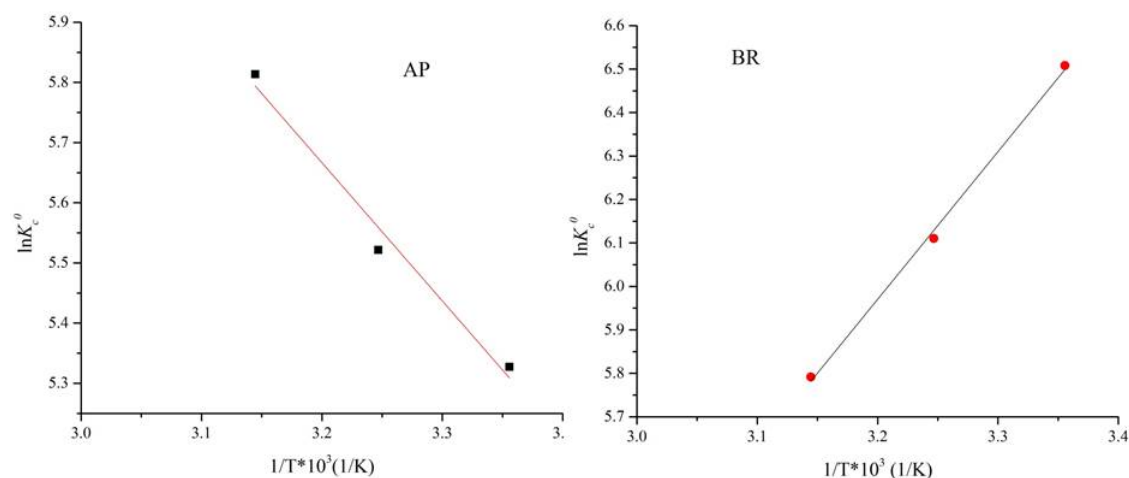

**Figure S5.** Van't Hoff plots for the adsorption of  $Pb^{2+}$  onto AP and BR (pH 5.0, contact time 120 min, sorbent concentration 2 g/L and initial  $Pb^{2+}$  concentration in range from 10–200 mg/L, temperature 293–323 K).

## References

1. Langmuir, I. The Adsorption of Gases on Plane Surfaces of Glass, Mica and Platinum. *Am. Chem. Soc.* **1918**, *40*, 1361–1403.
2. Freundlich, H.M.F. *J. Phys. Chem.* **1906**, *57*, 385–470.
3. Sips, R. Combined Form of Langmuir and Freundlich Equations. *J. Chem. Phys.* **1948**, *16*, 490–495.
4. Redlich, O.; Peterson, D.L. A Useful Adsorption Isotherm. *J. Phys. Chem.* **2007**, *63*, 1024–1024, doi:10.1021/j150576a611.
5. Lagergren, S. About the Theory of so Called Adsorption of Soluble Substances. *K Sven Veternskapsakad Handl* **1898**, *24*, 1–39.
6. Ho, Y.S.; McKay, G. Pseudo-Second Order Model for Sorption Processes. *Process Biochem* **1999**, *34*, 451–465.
7. Weber, W.; Morris, J. Kinetics of Adsorption on Carbon From solution. *J. Sanit. Eng. Div.* **1963**, *89*, 31–60.
